# Supplementary material for: Glucose Fluctuation and Severe Internal Carotid Artery Siphon Stenosis in Type 2 Diabetes Patients
Source: MDPI journal article supplement (doi:10.3390/nu13072379), 2021-07-12
Supplement: s1 [file s1]

## Supplementary Material

**Table S1. Baseline patient characteristics by degree of internal carotid artery siphon stenosis.**

| Variables                                                                                    | Intracranial internal carotid artery siphon stenosis |                       |                |
|----------------------------------------------------------------------------------------------|------------------------------------------------------|-----------------------|----------------|
|                                                                                              | Moderate ( <i>n</i> = 48)                            | Mild ( <i>n</i> = 47) | <i>p</i> value |
| Baseline demographics                                                                        |                                                      |                       |                |
| Female (%)                                                                                   | 12 (25)                                              | 14 (30)               | 0.65           |
| Age, years                                                                                   | 77 ± 5                                               | 76 ± 6                | 0.32           |
| Cerebrovascular risk factors                                                                 |                                                      |                       |                |
| Hypertension (%)                                                                             | 46 (96)                                              | 42 (89)               | 0.27           |
| Dyslipidemia (%)                                                                             | 42 (88)                                              | 41 (87)               | 1.00           |
| Current or past smoking (%)                                                                  | 28 (58)                                              | 26 (55)               | 0.84           |
| Atrial fibrillation (%)                                                                      | 10 (21)                                              | 6 (13)                | 0.41           |
| Medical history of percutaneous coronary intervention or coronary artery bypass grafting (%) | 23 (48)                                              | 18 (38)               | 0.41           |
| Ischemic stroke episode (%)                                                                  | 19 (40)                                              | 23 (49)               | 0.41           |
| Diabetes mellitus                                                                            |                                                      |                       |                |
| Duration, years                                                                              | 23 ± 11                                              | 22 ± 13               | 0.47           |
| HbA1c at registration, %                                                                     | 7.5 ± 1.0                                            | 7.5 ± 0.8             | 0.33           |
| Blood glucose at registration, mg/dL                                                         | 149 ± 49                                             | 152 ± 35              | 0.43           |
| Blood glucose (CGM average), mg/dL                                                           | 135 ± 27                                             | 138 ± 30              | 0.67           |
| SD, mg/dL                                                                                    | 40 ± 12                                              | 38 ± 9                | 0.63           |
| %CV                                                                                          | 29 ± 7                                               | 28 ± 5                | 0.50           |
| MAGE, mg/dL                                                                                  | 91 ± 26                                              | 89 ± 19               | 0.76           |

Continuous variables are shown as the mean (± SD), while categorical variables are shown as frequencies and percentages. Abbreviations: HbA1c, hemoglobin A1c; CGM, continuous glucose monitoring; SD, standard deviation; %CV, coefficient of variation; MAGE, mean amplitude of glycemic excursions.

**Table S2. Baseline patient characteristics by degree of middle cerebral artery stenosis**

| Variables                                                                                    | M1 portion of the middle cerebral artery stenosis |                        |                |
|----------------------------------------------------------------------------------------------|---------------------------------------------------|------------------------|----------------|
|                                                                                              | Moderate ( <i>n</i> = 3)                          | Mild ( <i>n</i> = 100) | <i>p</i> value |
| Baseline demographics                                                                        |                                                   |                        |                |
| Female (%)                                                                                   | 0 (0)                                             | 32 (32)                | 0.55           |
| Age, years                                                                                   | 74 ± 6                                            | 76 ± 5                 | 0.46           |
| Cerebrovascular risk factors                                                                 |                                                   |                        |                |
| Hypertension (%)                                                                             | 3 (100)                                           | 91 (91)                | 1.00           |
| Dyslipidemia (%)                                                                             | 3 (100)                                           | 88 (88)                | 1.00           |
| Current or past smoking (%)                                                                  | 2 (67)                                            | 55 (55)                | 1.00           |
| Atrial fibrillation (%)                                                                      | 0 (0)                                             | 17 (17)                | 1.00           |
| Medical history of percutaneous coronary intervention or coronary artery bypass grafting (%) | 1 (33)                                            | 44 (44)                | 1.00           |
| Ischemic stroke episode (%)                                                                  | 1 (33)                                            | 44 (44)                | 1.00           |
| Diabetes mellitus                                                                            |                                                   |                        |                |
| Duration, years                                                                              | 17 ± 10                                           | 23 ± 12                | 0.44           |
| HbA1c at registration, %                                                                     | 7.9 ± 0.6                                         | 7.5 ± 0.9              | 0.23           |
| Blood glucose at registration, mg/dL                                                         | 141 ± 32                                          | 150 ± 43               | 0.75           |
| Blood glucose (CGM average), mg/dL                                                           | 123 ± 29                                          | 138 ± 28               | 0.36           |
| SD, mg/dL                                                                                    | 34 ± 13                                           | 40 ± 11                | 0.39           |
| %CV                                                                                          | 27 ± 4                                            | 29 ± 6                 | 0.62           |
| MAGE, mg/dL                                                                                  | 80 ± 27                                           | 92 ± 23                | 0.37           |

Continuous variables are shown as the mean (± SD), while categorical variables are shown as frequencies and percentages. Abbreviations: HbA1c, hemoglobin A1c; CGM, continuous glucose monitoring; SD, standard deviation; %CV, coefficient of variation; MAGE, mean amplitude of glycemic excursions.
